# Supplementary material for: Influence of the PAN:PEO Ratio on the Morphology of Needleless Electrospun Nanofiber Mats Before and After Carbonization
Source: MDPI journal article supplement (doi:10.3390/fib12110097), 2024-11-08
Supplement: s1 [file s1]

# Influence of PAN:PEO ratio on the morphology of needleless electrospun nanofiber mats before and after carbonization

Nonsikelelo Sheron Mpofu <sup>1,2</sup>, Yusuf Topuz <sup>1</sup>, Elzbieta Stepula <sup>1</sup>, Uwe Güth <sup>3</sup>, Timo Grothe <sup>1</sup>, Jan Lukas Storck <sup>1</sup>, Martin Wortmann <sup>1</sup>, Boris Mahltig <sup>4</sup>, and Andrea Ehrmann <sup>1,\*</sup>

<sup>1</sup> Faculty of Engineering and Mathematics, Bielefeld University of Applied Sciences and Arts, 33619 Bielefeld, Germany; yusuf.topuz@hsbi.de; timo.grothe@hsbi.de; jan\_lukas.storck@hsbi.de; martin.wortmann@hsbi.de

<sup>2</sup> School of Engineering, Moi University, Eldoret, Kenya; nonsiempofu@gmail.com

<sup>3</sup> Department of Physical and Biophysical Chemistry (PC III), Faculty of Chemistry, Bielefeld University, 33615 Bielefeld, Germany; uwe.gueth@uni-bielefeld.de

<sup>4</sup> Niederrhein University of Applied Sciences, Faculty of Textile and Clothing Technology, 41065 Mönchengladbach, Germany; boris.mahltig@hs-niederrhein.de

\* Correspondence: andrea.ehrmann@hsbi.de

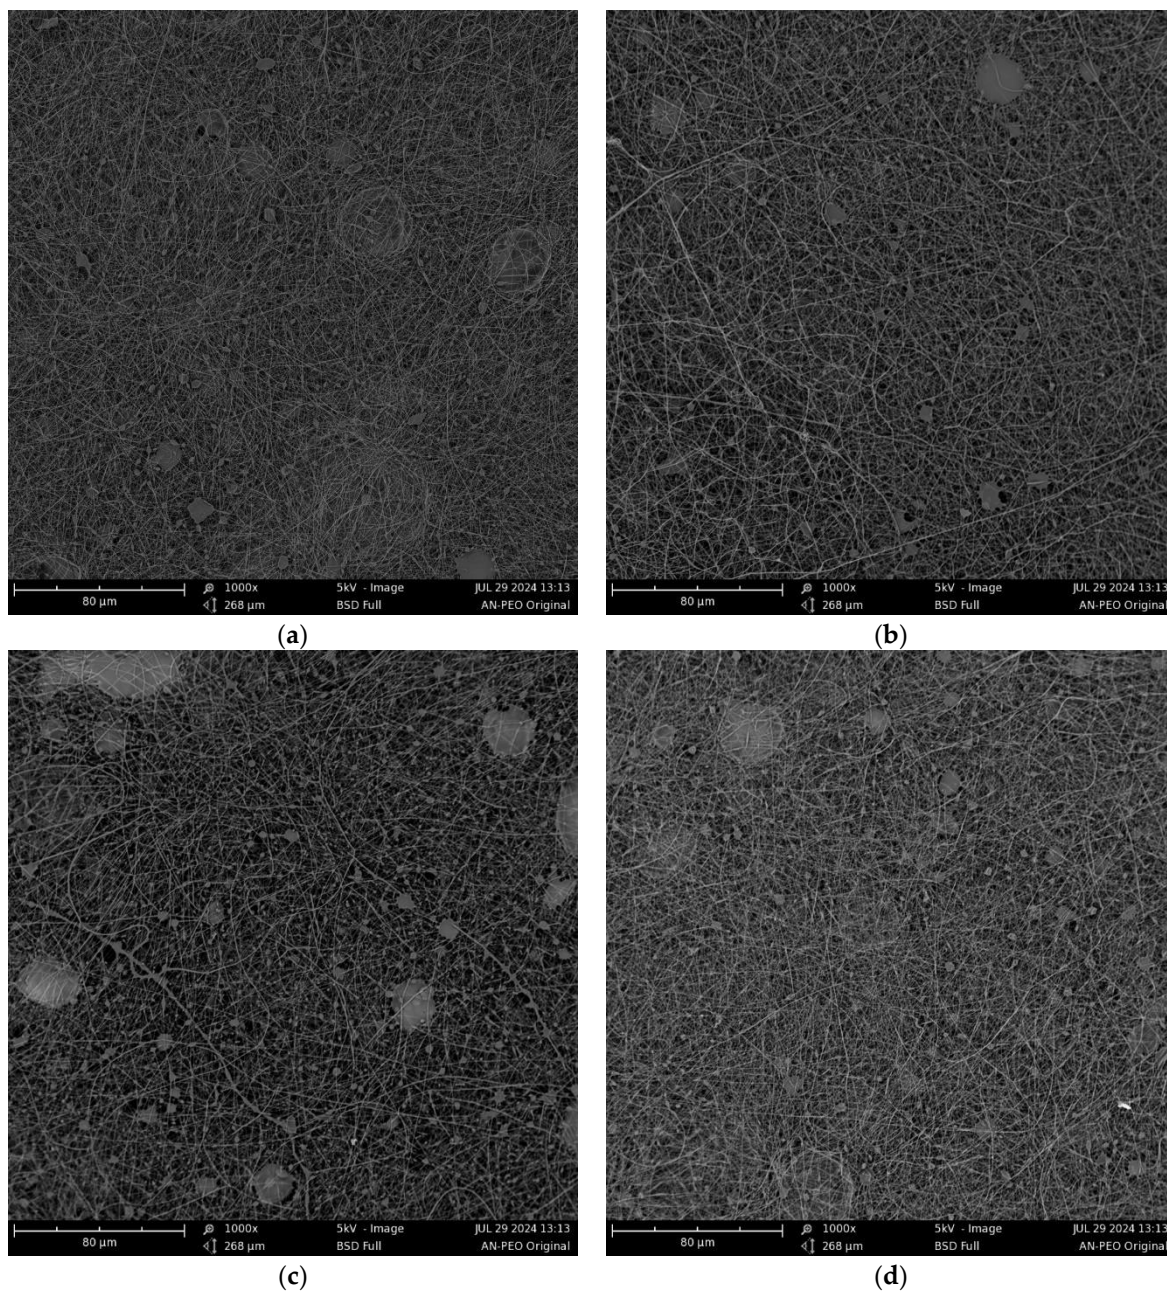

**Figure S1.** Scanning electron microscopy (SEM) images with nominal magnification 1000 x of PAN:PEO 9:1, PEO molecular weight: (a) 40 kDa; (b) 300 kDa; (c) 600 kDa; (d) 1000 kDa.

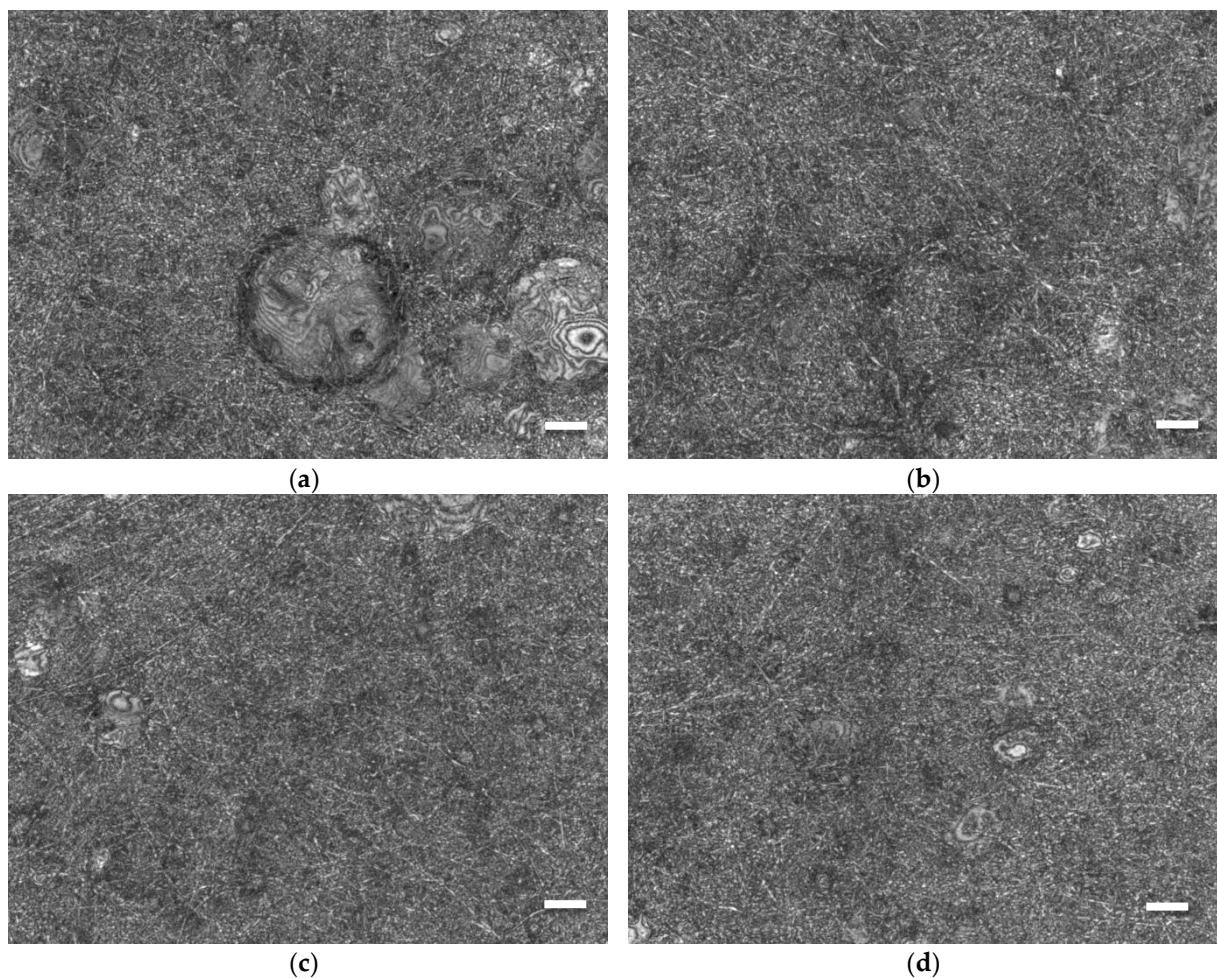

**Figure S2.** Confocal laser scanning microscope (CLSM) images with nominal magnification 2000 x of PAN:PEO 9:1, PEO molecular weight: (a) 40 kDa; (b) 300 kDa; (c) 600 kDa; (d) 1000 kDa. Scale bars correspond to 1  $\mu$ m.

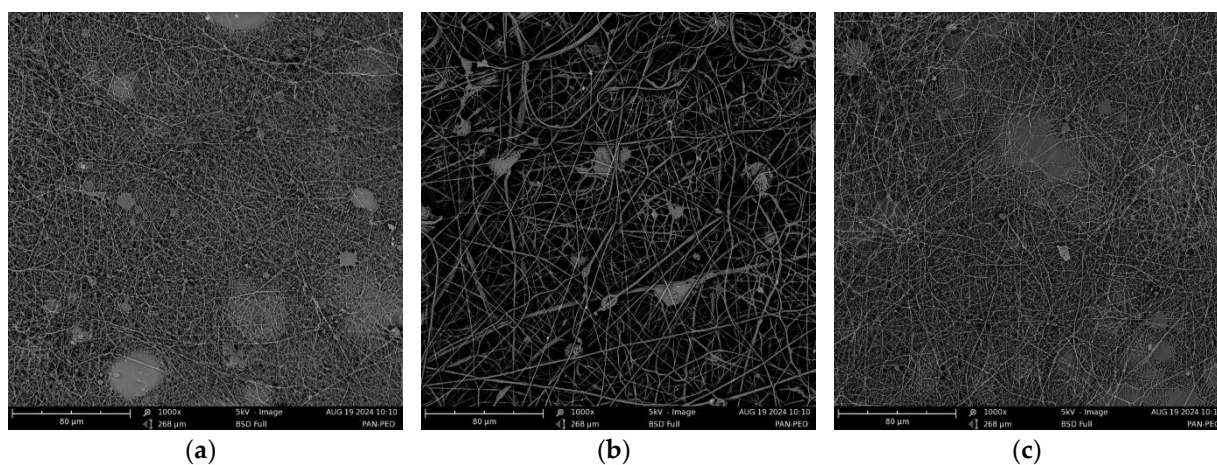

**Figure S3.** SEM images with nominal magnification 1000 x of PAN:PEO mixing ratios: (a) 8:2; (b) 7:3; (c) 6:4, using PEO with molecular weight 300 kDa.

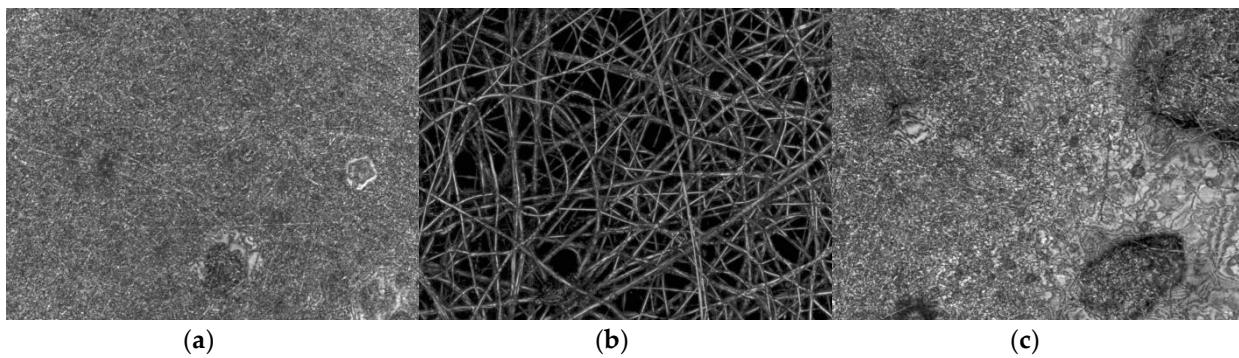

**Figure S4.** CLSM images with nominal magnification 2000 x of PAN:PEO mixing ratios: (a) 8:2; (b) 7:3; (c) 6:4, using PEO with molecular weight 300 kDa.

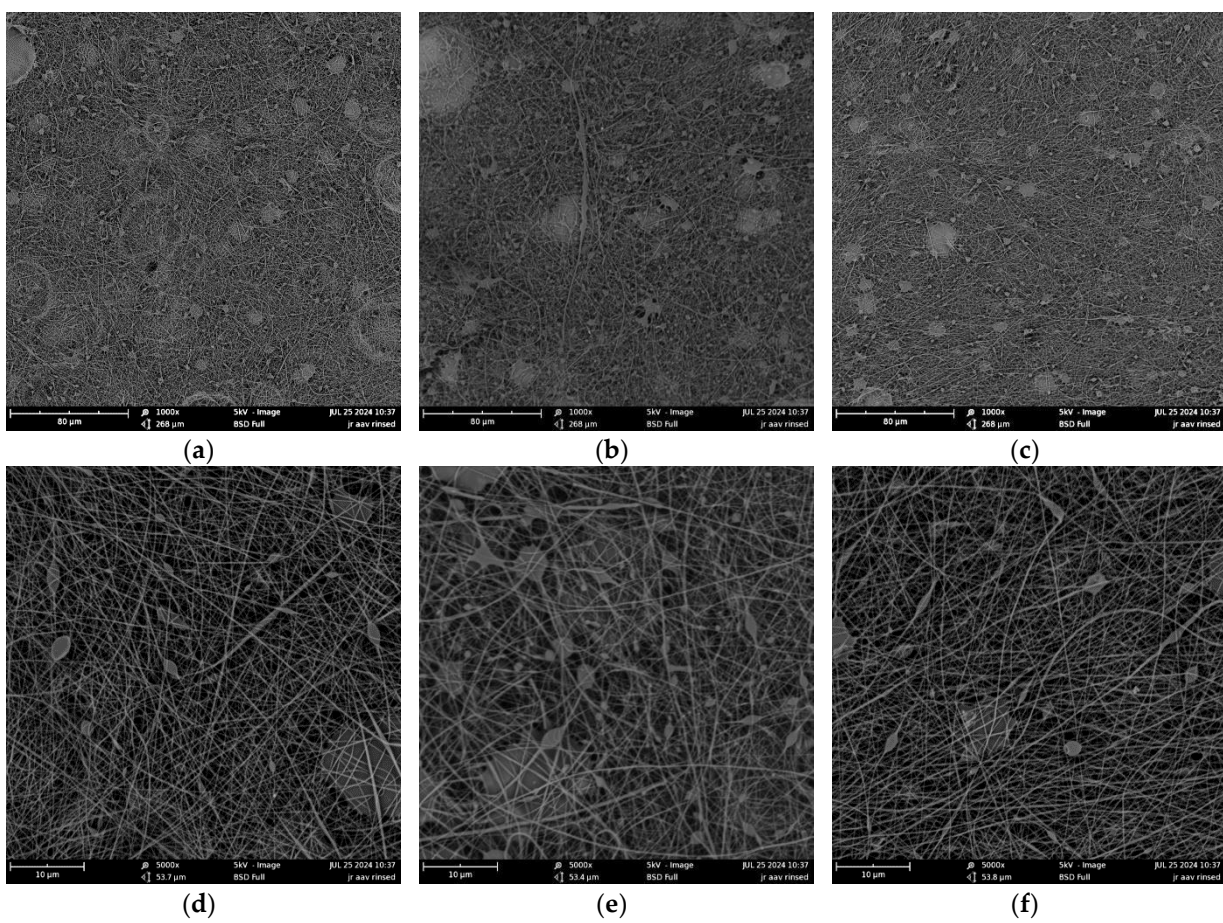

**Figure S5.** SEM images with nominal magnification 1000 x (upper row) and 5000 x (lower row) of PAN:PEO 9:1 samples after watering with PEO molecular weight (a,d) 40 kDa; (b,e) 600 kDa; (c,f) 1000 kDa.



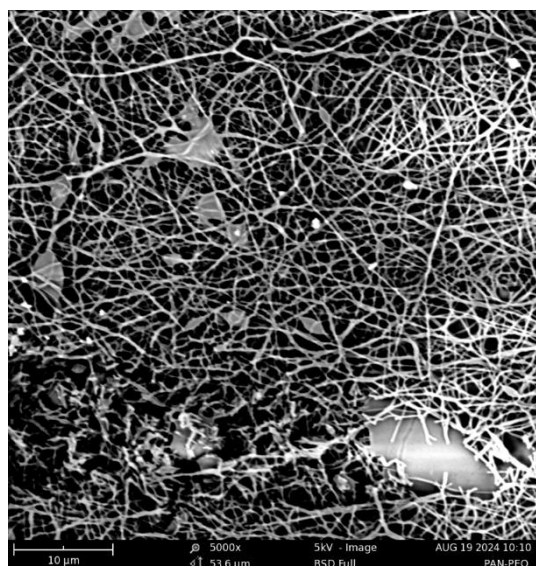

(a)

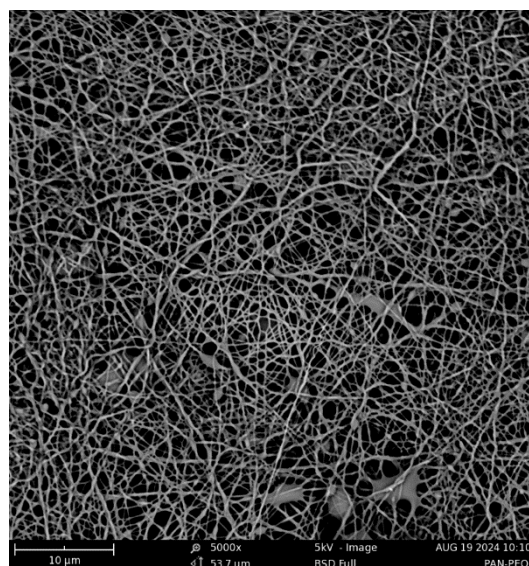

(b)

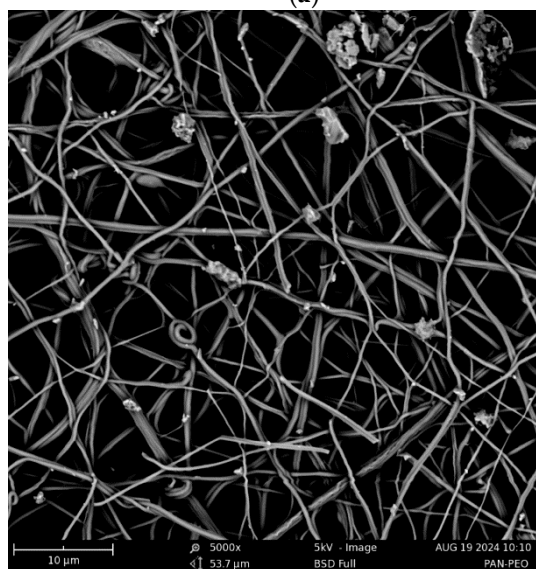

(c)

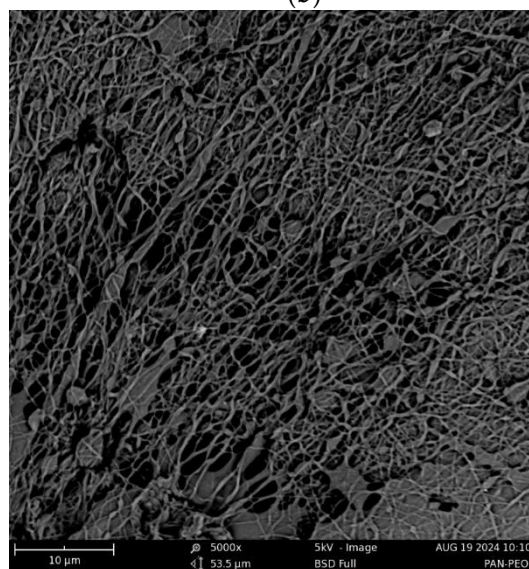

(d)

**Figure S6.** SEM images of PAN:PEO samples after stabilization with a PAN:PEO ratio of (a) 9:1; (b) 8:2; (c) 7:3; (d) 6:4 and PEO 300 kDa.

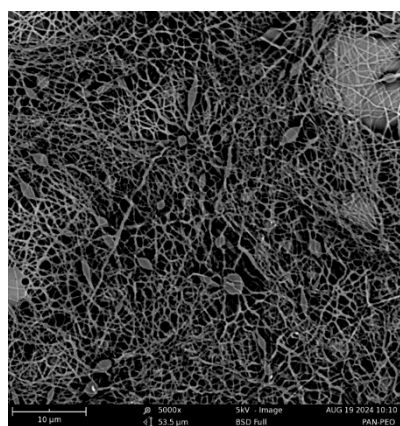

(a)

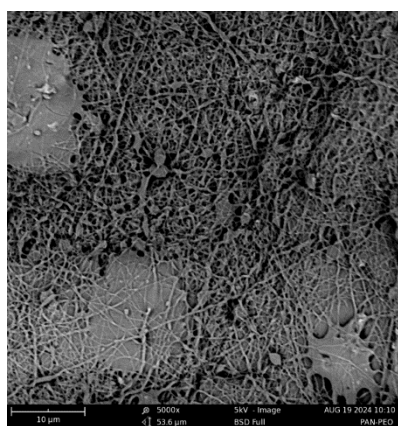

(b)

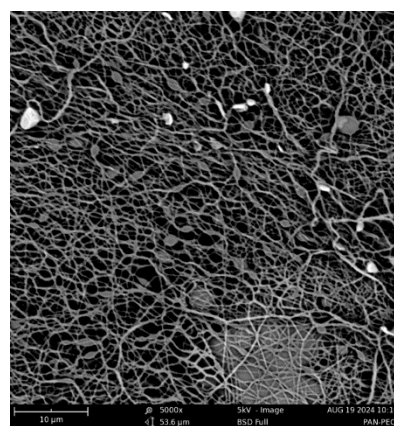

(c)

**Figure S7.** SEM images of PAN:PEO samples after stabilization with a PAN:PEO ratio of 9:1 and PEO molecular weights of (a) 40 kDa; (b) 600 kDa; (c) 1000 kDa.

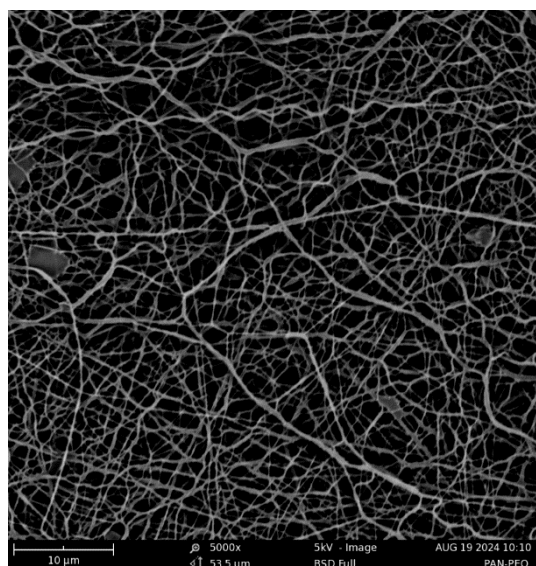

(a)

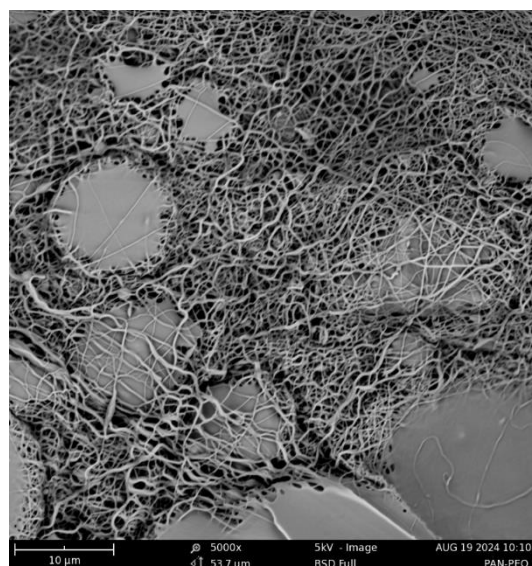

(b)

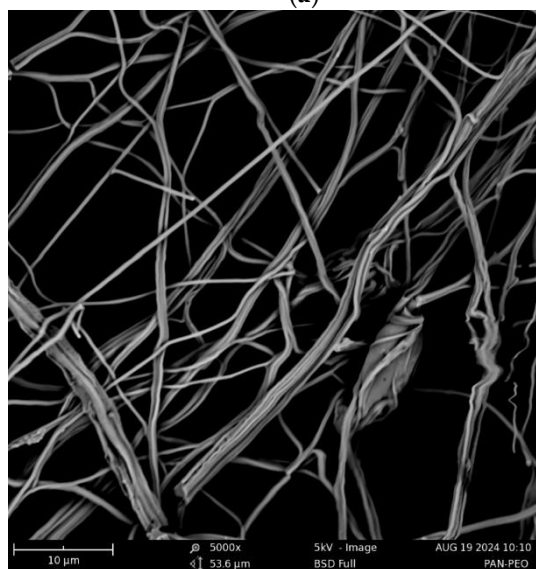

(c)

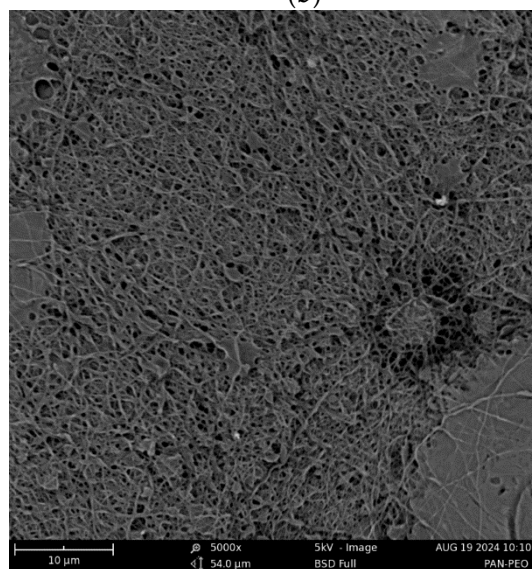

(d)

**Figure S8.** SEM images of PAN:PEO samples after carbonization with a PAN:PEO ratio of (a) 9:1; (b) 8:2; (c) 7:3; (d) 6:4 and PEO 300 kDa.

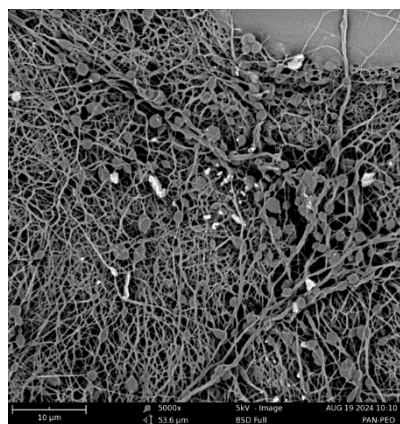

(a)

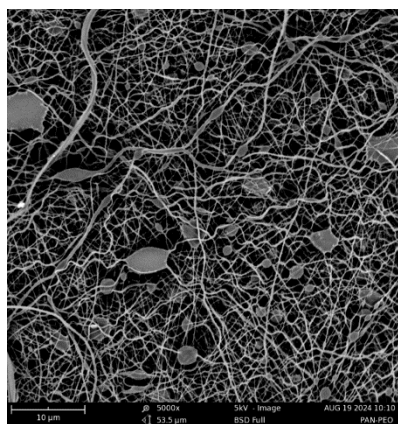

(b)

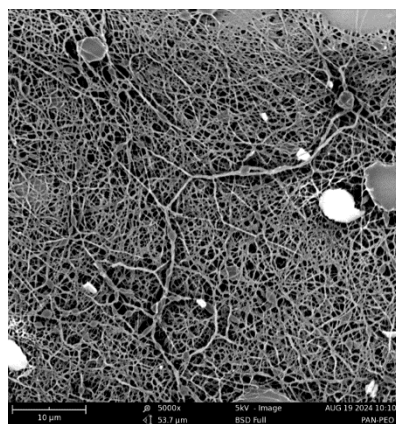

(c)

**Figure S9.** SEM images of PAN:PEO samples after carbonization with a PAN:PEO ratio of 9:1 and PEO molecular weights of (a) 40 kDa; (b) 600 kDa; (c) 1000 kDa.
